# Supplementary material
Source: Springer Nature journal article supplement (https://www.springermedizin.de/resource/supplementary/13012_2012_657_MOESM2_ESM.pdf/9630458)
Supplement: MOESM2 [file 9630458]

## List of websites searched

<http://www.chestnet.org/accp/guidelines/development-process?page=0,6>

<http://www.sign.ac.uk/methodology/index.html>

<http://www.nhmrc.gov.au/guidelines/how-nhmrc-develops-its-guidelines>

<http://www.guidelines.gov/content.aspx?id=11881>

<http://www.cebm.net/index.aspx?o=1025>

<http://www.egappreviews.org/workingrp/methods.htm>

<http://www.gradeworkinggroup.org/publications/index.htm>

[http://www.icsi.org/guidelines and more/evidence grading system 6/](http://www.icsi.org/guidelines%20and%20more/evidence%20grading%20system%206/)

<http://www.uspreventiveservicestaskforce.org/>

<http://www.nice.org.uk/>

<http://canadiantaskforce.ca/guidelines/>

<http://www.ahrq.gov/>

<http://www.eular.org/index.cfm?framePage=/recommendations.cfm>

<http://www.escardio.org/guidelines-surveys/esc-guidelines/about/Pages/rules-writing.aspx>

[http://www.openclinical.org/prj\\_agree.html](http://www.openclinical.org/prj_agree.html)

<http://www.equator-network.org/research-projects/>

<http://www.thoracic.org/statements/>
